# Supplementary material for: Exploring the experience of family caregivers of children with medical complexity during COVID-19: a qualitative study
Source: Springer Nature journal article supplement (doi:10.1186/s12887-023-03944-z), 2023-04-06
Supplement: MOESM3 [file 25216722]

### **Additional file 3: Initial Coding Tree**

#### **EXPERIENCES WITH THE HEALTHCARE SYSTEM AMID THE PANDEMIC**

- Lack of access to healthcare services and increased hospital restrictions
  - o Lack of access to allied health
  - o Decreased participation in supportive therapy
  - o Challenges of in-hospital visitor restrictions
  - o Other
- Negative clinical interactions and communication breakdowns
  - o Feeling disrespected by healthcare providers
  - o Insensitive care
  - o Poor communication with healthcare team
  - o Frustration with delays
  - o Other
- Virtual care use
  - o Decreased burden of in-person visits
  - o Increased connectedness
  - o Value of e-health apps
  - o Other

#### **PANDEMIC'S IMPACT ON FC WELL-BEING**

- Physical Toll
  - o Chronic and intense care demands
  - o Inability to sleep
  - o Physical demands from lifting and transfers
  - o Other
- Mental Toll
  - o Nonstop vigilance
  - o Worsening stress and mental exhaustion
  - o Guilt in asking for help
  - o Role of being more than just a parent
  - o Inability to engage in self-care
  - o Feeling of isolation
  - o Extreme fear of COVID-19
  - o Other

#### **COMMON CHALLENGES DURING THE PANDEMIC**

- Financial strain
  - o Significance of costs to meet care needs of CMC
  - o Impact of caregiving on ability to work
  - o Lack of funding and financial support
  - o Significance of administrative work
  - o Other
- Balancing multiple roles
  - o Acting as a medical professional
  - o Burden of coordinating care

- Complex administrative work associated with care
- Lack of family and homecare nursing support
- Advocating for child's needs
- Impact on family dynamics
- Other
- Inadequate homecare nursing
  - Challenges of frequent nurse turnover
  - Burden of scheduling nurses
  - Concerns with nurse competence
  - Negative experiences
  - Frustration with lack of improvement
  - Other
